# Supplementary material for: Electronically delocalized Ir enables efficient and stable acidic water splitting
Source: Royal Society of Chemistry journal article supplement (doi:10.1039/d0ta07416k), 2020-01-01
Supplement: d0ta07416k1.pdf [file d0ta07416k1.pdf]

## Supporting information

for

### **Electronically delocalized Ir enables stable and efficient acidic water splitting**

Hao Hu<sup>a‡</sup>, Farhad MD Kazim<sup>a‡</sup>, Zihao Ye<sup>a</sup>, Yuhua Xie<sup>a</sup>, Quan Zhang<sup>a</sup>,  
Konggang Qu<sup>b</sup>, Jingxiang Xu<sup>c\*</sup>, Weiwei Cai<sup>a\*</sup>, Shenglin Xiao<sup>a</sup> and Zehui Yang<sup>a\*</sup>

<sup>a</sup>Sustainable Energy Laboratory, Faculty of Materials Science and Chemistry,  
China University of Geosciences Wuhan, 388 Lumo RD, Wuhan, 430074,  
China

<sup>b</sup>Shandong Provincial Key Laboratory/Collaborative Innovation Center of  
Chemical Energy Storage & Novel Cell Technology, Liaocheng University,  
Liaocheng, 252059, China.

<sup>c</sup>College of Engineering Science and Technology, Shanghai Ocean University,  
Shanghai 201306, China.

Hao Hu and Farhad MD Kazim equally contributed to this work.

## Experimental section

**Materials:** Chloroauric acid ( $\text{HAuCl}_4 \cdot 4\text{H}_2\text{O}$ ), hydroxylate multi-walled carbon nanotubes, iridium (III) trichloride ( $\text{IrCl}_3$ , 99.95%) and iridium (IV) oxide ( $\text{IrO}_2$ , 99.9%, metals basis) were purchased from Aldrich Chemical. Ethylene glycol and ethanol were purchased from Sinopharm Chemical Reagent Co., LTD. Nafion solution (5 wt%) and 20 wt% Pt/C was obtained from Alfa Aesar. The water used in all experiments was deionized water (DIW). All chemicals were used as received without further purification.

**Material characterization:** The morphologies and structures were characterized by field-emission scanning electron microscopy (SEM, Hitachi SU8010) and transmission electron microscopy (TEM, Tecnai G2 F20). The crystal structure of the synthesized electrocatalyst was detected by X-ray diffraction (XRD, Bruker AXS D8-Focus, Germany) with  $\text{Cu K}\alpha$  radiation in the range of  $2\theta$  from  $30^\circ$  to  $70^\circ$ . X-ray photoelectron spectroscopy (XPS) was performed by using Thermo-Scientific K-Alpha equipment. Brunauer–Emment–Teller (BET) surface areas and pore size measurements were performed with  $\text{N}_2$  adsorption/adsorption isotherms at 77 K on a Quantachrome Autosorb-iQ2 instrument. The amount of metals in the catalyst was calculated by the ICP-OES method using Perkin Elmer Optima 5300 DV. The Ir  $\text{L}_3$ -edge XAS spectra was carried in fluorescence mode in SPring-8. The acquired XAS data were processed according to the standard procedures using the ATHENA module implemented in the IFEFFIT software package and FEFF8.20.

**Electrochemical measurements:** Electrochemical measurements were conducted with Gamry (interface 1000E, USA) instrument at room temperature of 25°C. Electrocatalyst ink was prepared by dispersing freshly synthesized catalyst powder (2 mg) in a solution containing 800  $\mu\text{L}$  of deionized water, 185  $\mu\text{L}$  of isopropanol and 15  $\mu\text{L}$  of Nafion solution (5 wt%) followed by ultrasonication for 2 h. Then 10  $\mu\text{L}$  of the ink was cast on a glassy carbon electrode (GCE, diameter = 3 mm) to prepare a working electrode. All electrochemical experiments were carried out in a three-electrode glass cell with a carbon rod as the counter electrode and an Ag/AgCl as the reference electrode. The 0.5 M  $\text{H}_2\text{SO}_4$  solution was used for the electrochemical electrolyte and the solutions were saturated with  $\text{N}_2$  for 30 min prior to the HER or overall water splitting test or with  $\text{O}_2$  prior to the OER test. The linear sweep voltammetry curves were recorded with a scan rate of 5  $\text{mV s}^{-1}$ . CV was carried out with a scan rate of 50  $\text{mV s}^{-1}$ . The electrochemical double-layer capacitance was measured at different scan rates from 10 to 100  $\text{mV s}^{-1}$ . EIS was measured from 100 kHz to 0.05 Hz under AC voltage amplitude of 5 mV and DC voltage based at a given potential at 10  $\text{mA cm}^{-2}$ . The long-term stability was measured by chronoamperometric (I-t) stability examination at a given potential. As for the water electrolysis, a two-electrode system was applied for the overall water splitting. The catalysts were first loaded onto GCE (loading: 0.285  $\text{mg cm}^{-2}$ ) and used as both the anode and cathode. All data were presented without iR compensation. All potential were converted to the

reversible hydrogen electrode (RHE) based on the equation:  $E(\text{RHE})=E(\text{Ag}/\text{AgCl})+0.241+0.059*\text{pH}$ . In this work, we assumed the pH was 0 for 0.5 M  $\text{H}_2\text{SO}_4$  electrolyte. Turnover frequency (TOF) was calculated based on the following equation:  $\text{TOF}_{\text{catalyst}} (\text{s}^{-1}) = i_0 (\text{A cm}^{-2}) / \{[\text{Density of Ir atoms in the catalyst (sites/cm}^2)] \times [1.602 \times 10^{-19} (\text{C/e}^-)] \times [2 \text{ e}^-/\text{H}_2]\}$ .

**Computational details:** All periodic density functional theory (DFT) calculations with spin polarization were performed by using the Vienna ab initio simulation package (VASP) with the Perdew–Burke–Ernzerhof (PBE) exchange-correlation functional. The projector-augmented plane wave (PAW) was used to describe the interactions between core electrons and ions. A plane-wave cutoff energy was tested and set to 400 eV in all calculations.  $3 \times 3 \times 1$  Monkhorst-Pack grid k-points are employed for geometric optimization, and the convergence threshold is set as  $10^{-4}$  eV in energy and 0.02 eV/Å in force, respectively. To calculate the free energy diagram of the OER process and HER, we employ the model of Ir (111) and AuIr (111)  $\sqrt{3} \times \sqrt{3}$  surfaces. A vacuum distance of 15 Å was imposed between neighboring slab images in order to avoid interactions between periodic images.

**OER:** The reaction free energy  $\Delta G$  for oxygen evolution reaction (OER) is approximated as:

$$\Delta G = \Delta E + \Delta \text{ZPE} - T\Delta S,$$

where  $\Delta E$ ,  $\Delta \text{ZPE}$ , and  $\Delta S$  are the different adsorption energy, zero-point energy, and entropy of the reaction, respectively. Here, the adsorption

energies of O\*, OH\*, and OOH\* were calculated by

$$\Delta E_{OH^*} = E(OH^*) - E(^*) - (E_{H_2O} - 1/2 E_{H_2}),$$

$$\Delta E_{O^*} = E(O^*) - E(^*) - (E_{H_2O} - E_{H_2}),$$

$$\Delta E_{OOH^*} = E(OOH^*) - E(^*) - (2E_{H_2O} - 3/2 E_{H_2}),$$

where  $E(^*)$ ,  $E(OH^*)$ ,  $E(O^*)$ , and  $E(OOH^*)$  are the ground state energies of a Ir or IrAu surface, Ir or IrAu surface adsorbed with OH\*, O\*, and OOH\*, respectively.  $E_{H_2O}$  and  $E_{H_2}$  are the calculated DFT energies of H<sub>2</sub>O and H<sub>2</sub> molecules in the gas phase.

**HER:** The hydrogen adsorption free energies were calculated as:

$$\Delta G_{H^*} = \Delta E_{H^*} + \Delta ZPE - T\Delta S,$$

where  $\Delta E_{H^*}$  is the hydrogen chemisorption energy.  $\Delta ZPE$  and  $\Delta S$  are the zero-point energy difference and the entropy difference between the adsorbed and the gas phase, respectively. Here, the hydrogen chemisorption energy is defined by

$$\Delta E_{H^*} = 1/n (E(\text{slab}+nH) - E(\text{Surf}) - n/2 E(H_2)),$$

where n is the number of H atoms in the calculations,  $E(\text{slab}+nH)$ ,  $E(\text{Surf})$ , and  $E(H_2)$  are the total energies of the adsorption of n H atoms, clean surfaces, and gaseous hydrogen molecule, respectively.

**Table S1** Comparison of OER activities of Ir-based electrocatalysts tested in 0.5 M H<sub>2</sub>SO<sub>4</sub> electrolyte.

| Electrocatalyst                          | Ir loading<br>( $\mu\text{g cm}^{-2}$ ) | Overpotential@10 mA cm <sup>-2</sup><br>( mV vs. RHE) | Ref.      |
|------------------------------------------|-----------------------------------------|-------------------------------------------------------|-----------|
| Au <sub>0.5</sub> Ir <sub>0.5</sub> @CNT | 14.3                                    | 257                                                   | this work |
| Ir-STO                                   | 54                                      | 247                                                   | 1         |
| Li-IrOx                                  | 50                                      | 290                                                   | 2         |
| Ru@IrOx                                  | 58                                      | 282                                                   | 3         |
| IrOx/ATO                                 | 10.2                                    | 440                                                   | 4         |
| Ir-Cu nanocrystals                       | 60                                      | 310                                                   | 5         |
| IrPd nanocages                           | 12.5                                    | 226                                                   | 6         |
| IrW/C                                    | 10.2                                    | 310                                                   | 7         |
| IrNi-RF                                  | 10.4                                    | 313.6                                                 | 8         |
| Ir nanosheets                            | 200                                     | 240                                                   | 9         |
| Ir@Co <sub>4</sub> N NFs                 | 29                                      | 310                                                   | 10        |
| Co-RuIr                                  | 33                                      | 235                                                   | 11        |
| Ir WNWs                                  | 31                                      | 270                                                   | 12        |

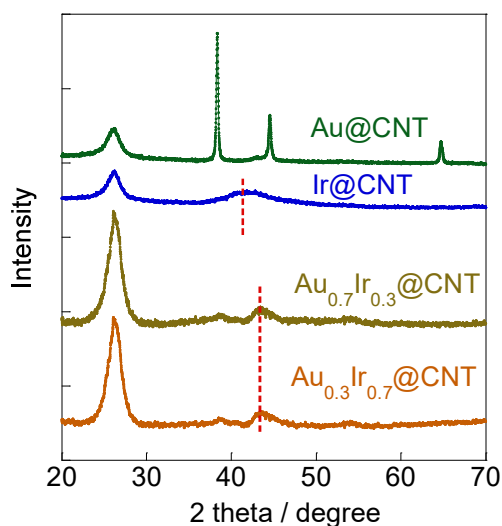

**Figure S1** XRD patterns of Au@CNT, Au<sub>0.3</sub>Ir<sub>0.7</sub>@CNT, Au<sub>0.7</sub>Ir<sub>0.3</sub>@CNT and

Ir@CNT.

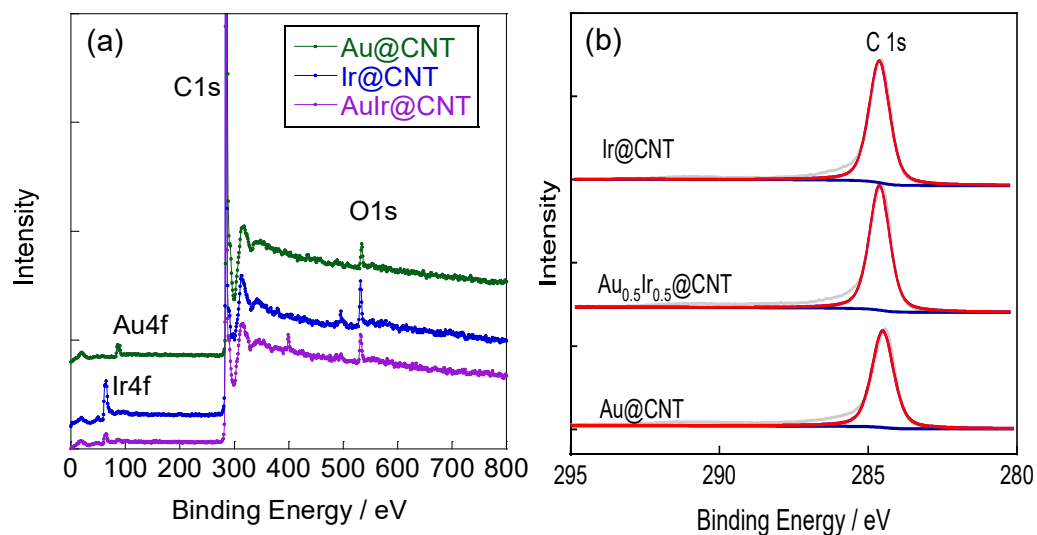

**Figure S2** (a) XPS survey scan calibrated C1s peaks (b) of Au@CNT, Au<sub>0.5</sub>Ir<sub>0.5</sub>@CNT and Ir@CNT electrocatalysts.

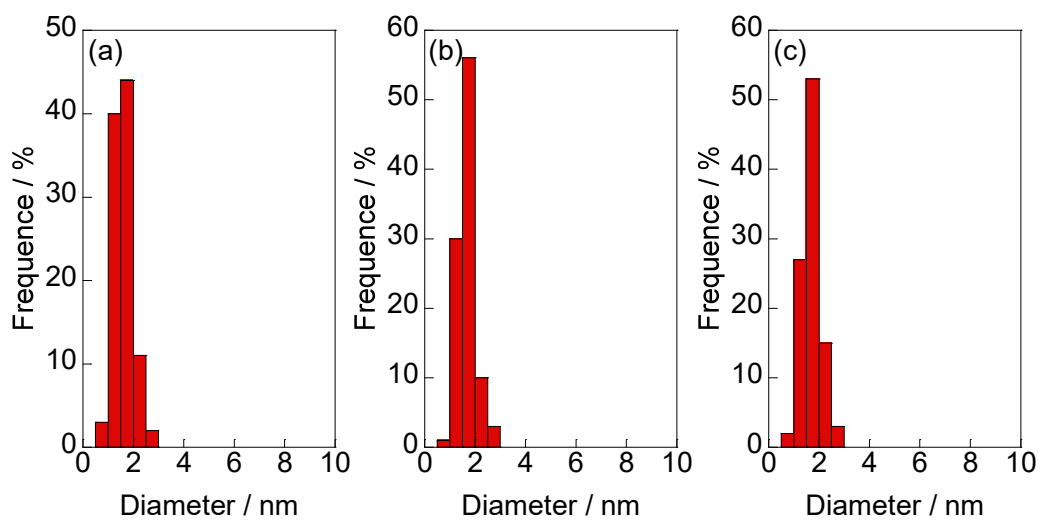

**Figure S3** Histograms of size distributions of Au@CNT (a), Ir@CNT (b) and Au<sub>0.5</sub>Ir<sub>0.5</sub>@CNT (c) electrocatalysts.

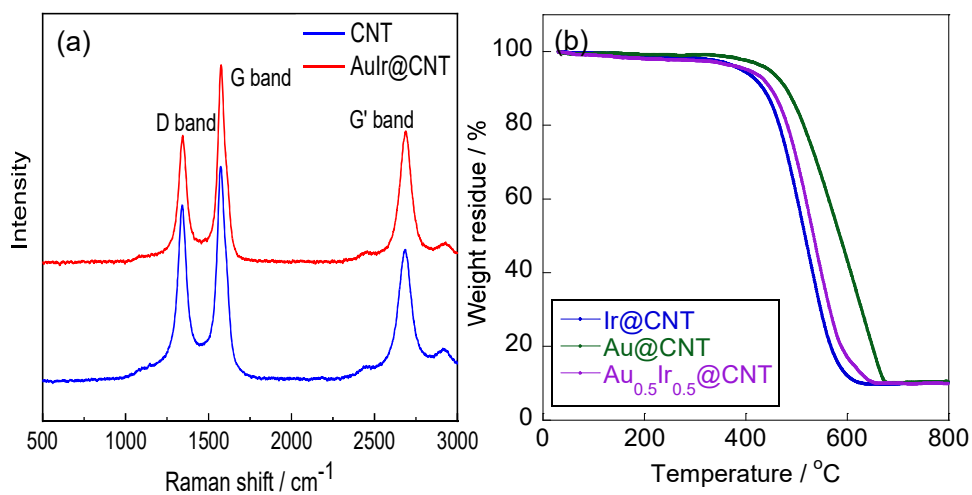

**Figure S4** (a) Raman spectroscopies of CNT and Au<sub>0.5</sub>Ir<sub>0.5</sub>@CNT. (b) TGA curves of Au@CNT, Ir@CNT and Au<sub>0.5</sub>Ir<sub>0.5</sub>@CNT electrocatalysts recorded from room temperature to 800  $^{\circ}\text{C}$  under air flow.

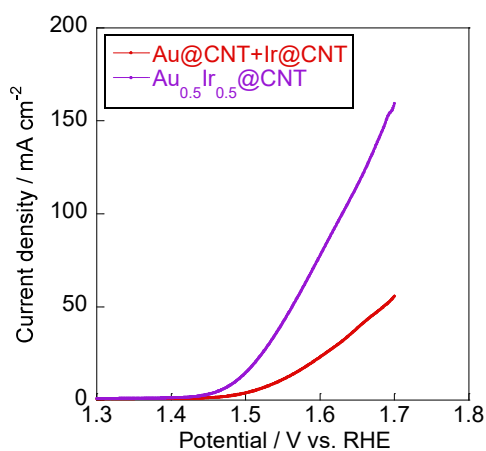

**Figure S5** OER performance of Au<sub>0.5</sub>Ir<sub>0.5</sub>@CNT and physical mixed Au@CNT/Ir@CNT (1:1) in 0.5 M H<sub>2</sub>SO<sub>4</sub> electrolyte.



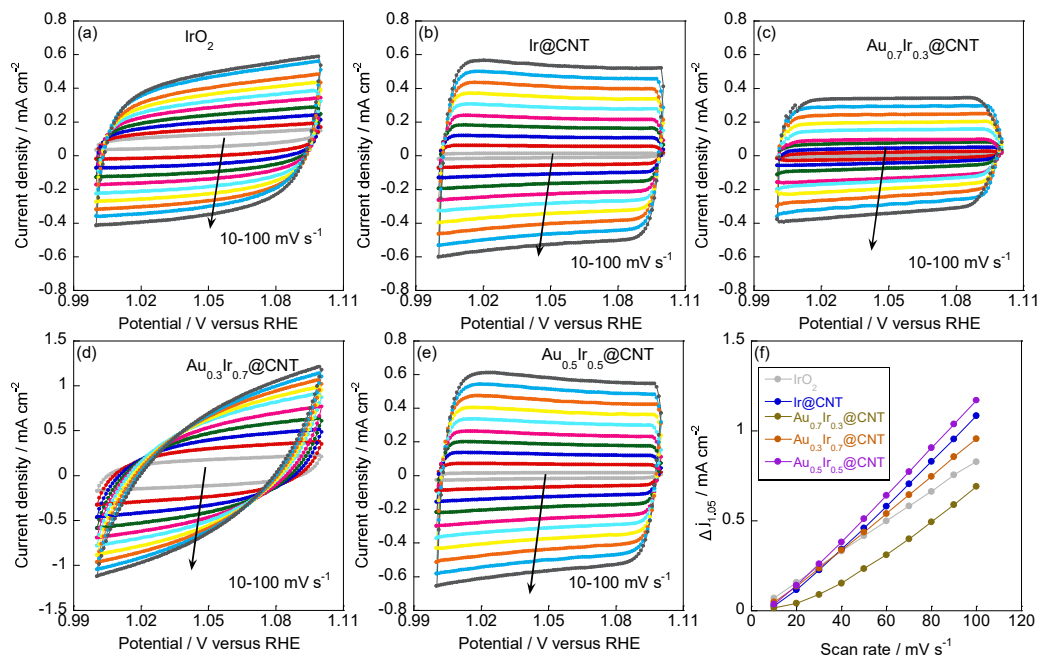

**Figure S6** Cyclic voltammograms recorded for IrO<sub>2</sub> (a), Ir@CNT (b), Au<sub>0.7</sub>Ir<sub>0.3</sub>@CNT (c), Au<sub>0.3</sub>Ir<sub>0.7</sub>@CNT (d) and Au<sub>0.5</sub>Ir<sub>0.5</sub>@CNT (e) with various scan rates. (f) Calculated double-layer capacitances of various electrocatalysts.

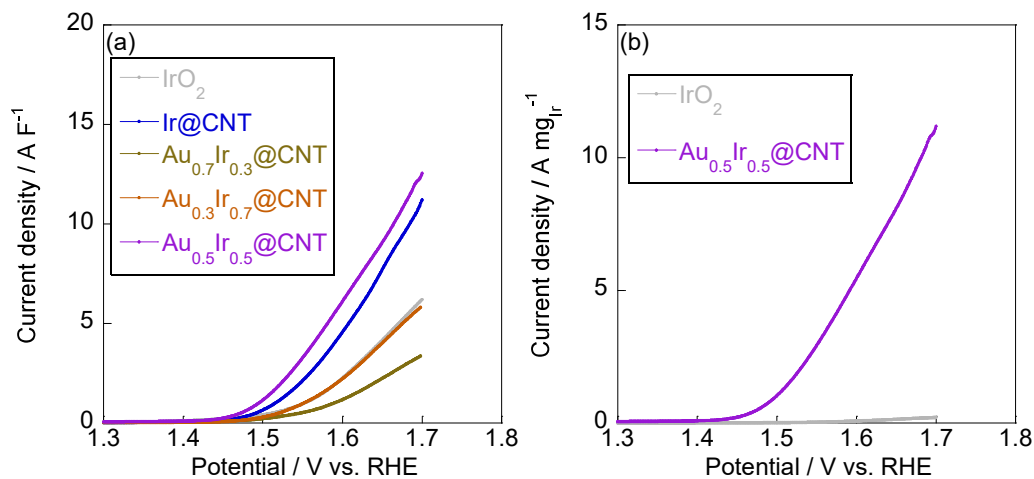

**Figure S7** Specific (a) and mass (b) activities of IrO<sub>2</sub>, Ir@CNT, Au<sub>0.7</sub>Ir<sub>0.3</sub>@CNT, Au<sub>0.3</sub>Ir<sub>0.7</sub>@CNT and Au<sub>0.5</sub>Ir<sub>0.5</sub>@CNT electrocatalysts.

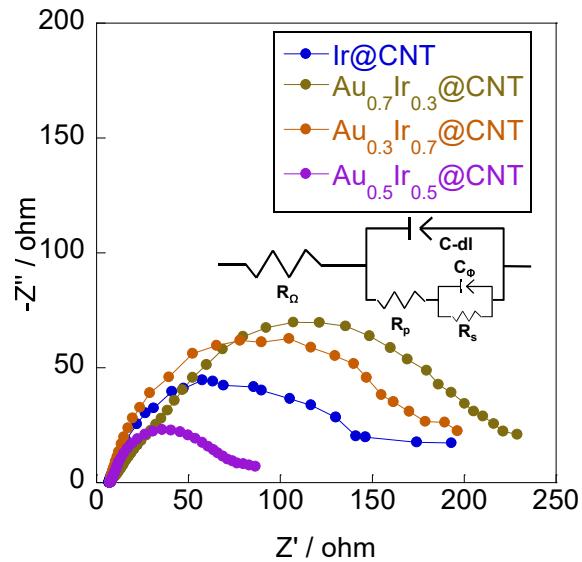

**Figure S8** Electrochemical impedance spectroscopies of Ir@CNT, Au<sub>0.7</sub>Ir<sub>0.3</sub>@CNT, Au<sub>0.3</sub>Ir<sub>0.7</sub>@CNT and Au<sub>0.5</sub>Ir<sub>0.5</sub>@CNT electrocatalysts.

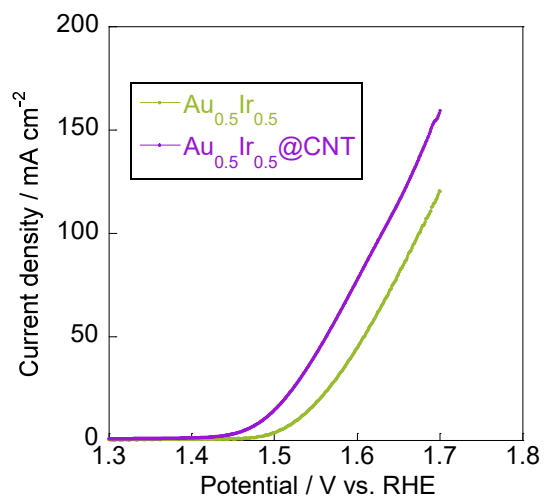

**Figure S9** OER performance of unsupported Au<sub>0.5</sub>Ir<sub>0.5</sub> and Au<sub>0.5</sub>Ir<sub>0.5</sub>@CNT electrocatalyst.

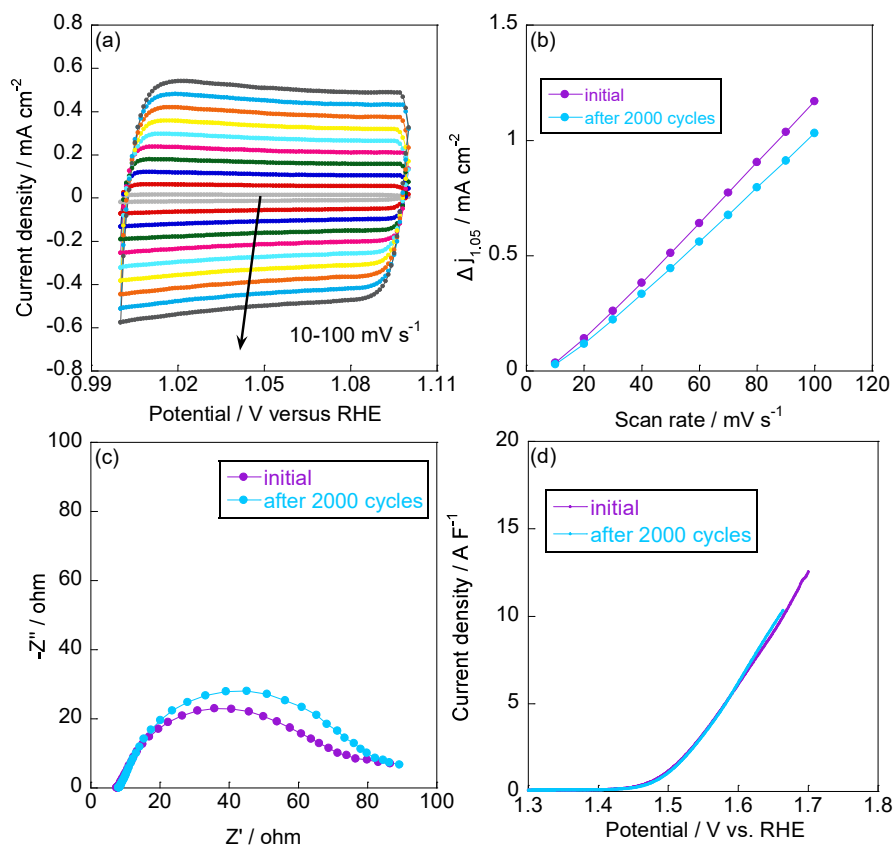

**Figure S10** Cyclic voltammety curves (a), double-layer capacitances (b), electrochemical impedance spectroscopies (c) and specific activities (d) of  $\text{Au}_{0.5}\text{Ir}_{0.5}@CNT$  electrocatalyst after 2000 potential cycles.

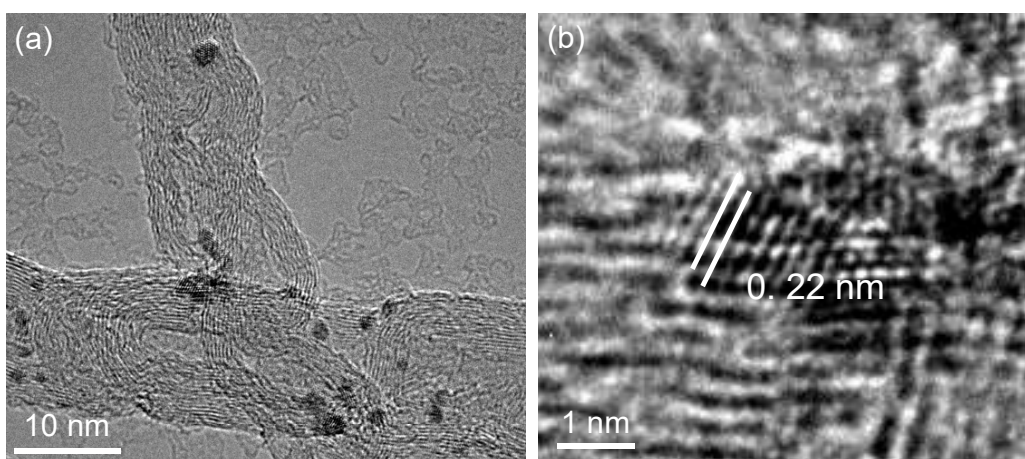

**Figure S11** TEM (a) and HR-TEM (b) images of  $\text{Au}_{0.5}\text{Ir}_{0.5}@CNT$  electrocatalyst after 2000 potential cycles.

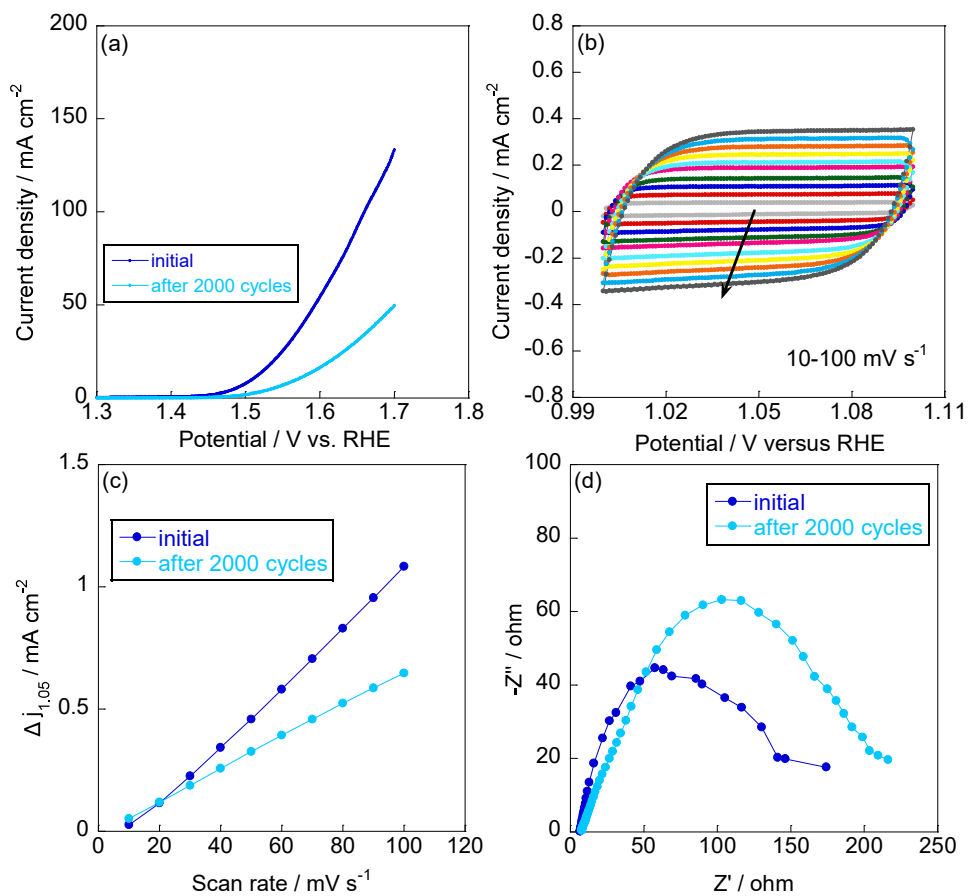

**Figure S12** OER performance (a), cyclic voltammety curves (b), double-layer capacitances (c) and electrochemical impedance spectroscopies (d) of Ir@CNT electrocatalyst after 2000 potential cycles.

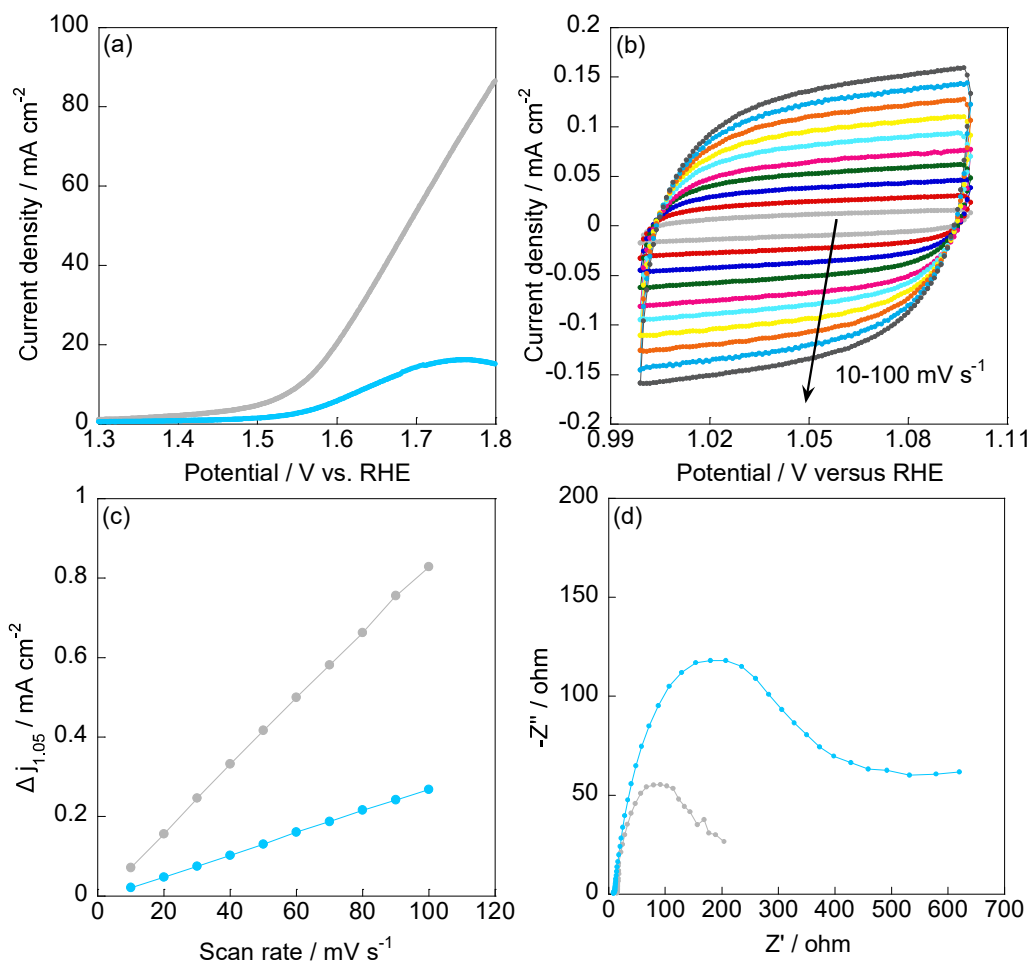

**Figure S13** OER performance (a), cyclic voltammetry curves (b), double-layer capacitances (c) and electrochemical impedance spectroscopies (d) of commercial IrO<sub>2</sub> electrocatalyst after 1000 potential cycles.

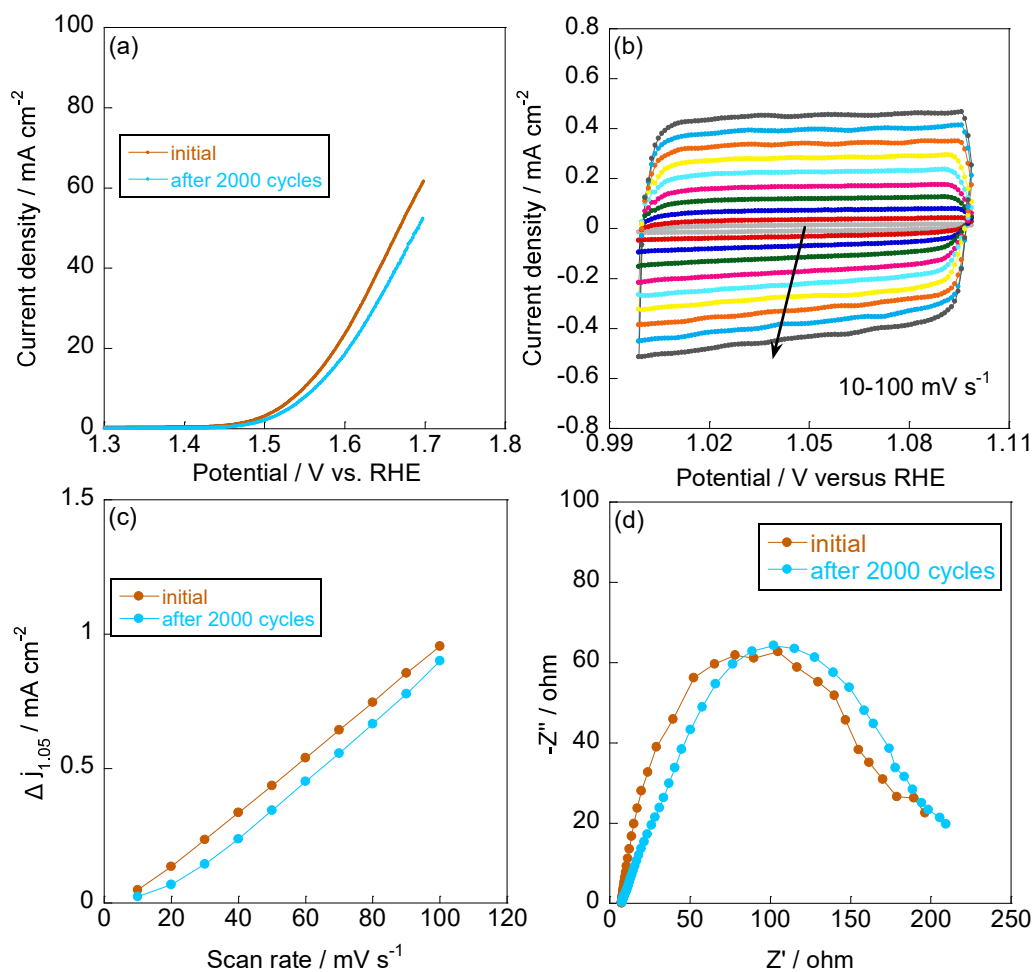

**Figure S14** OER performance (a), cyclic voltammetry curves (b), double-layer capacitances (c) and electrochemical impedance spectroscopies (d) of  $\text{Au}_{0.3}\text{Ir}_{0.7}@CNT$  electrocatalyst after 2000 potential cycles.

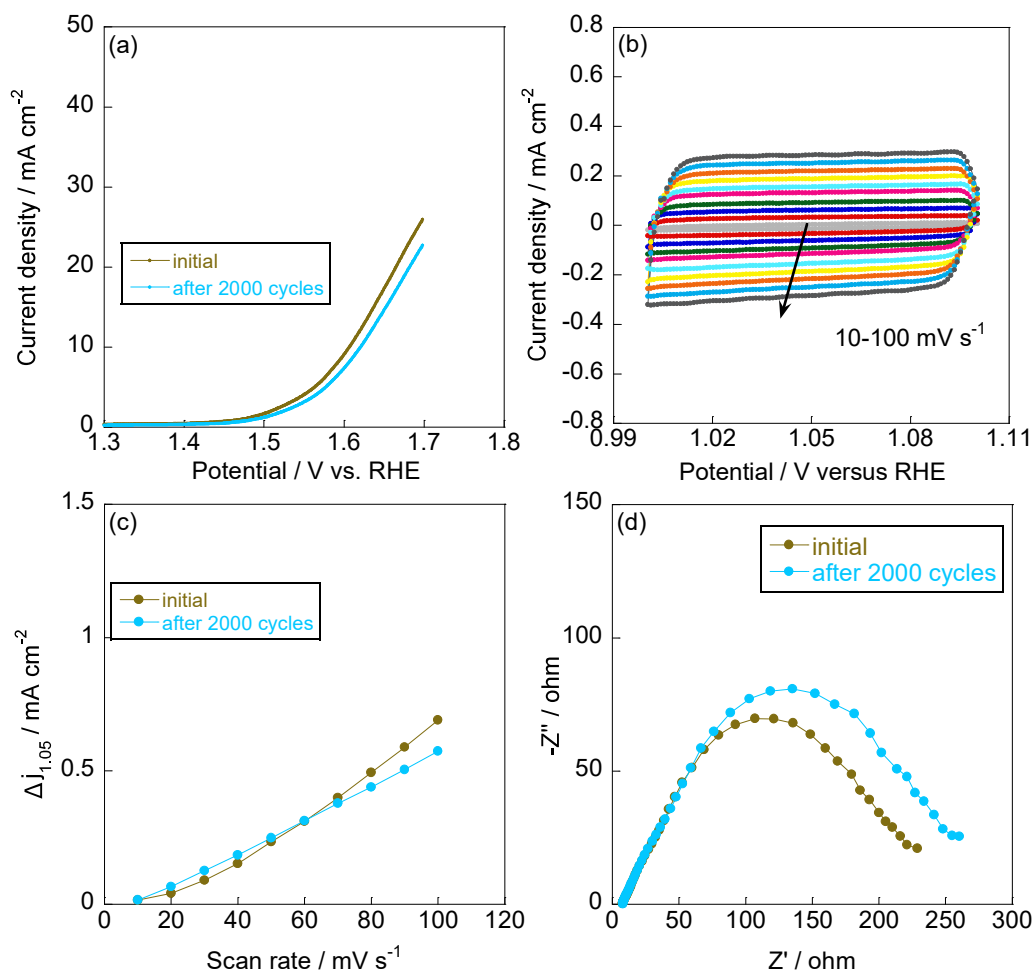

**Figure S15** OER performance (a), cyclic voltammetry curves (b), double-layer capacitances (c) and electrochemical impedance spectroscopies (d) of  $\text{Au}_{0.7}\text{Ir}_{0.3}@CNT$  electrocatalyst after 2000 potential cycles.

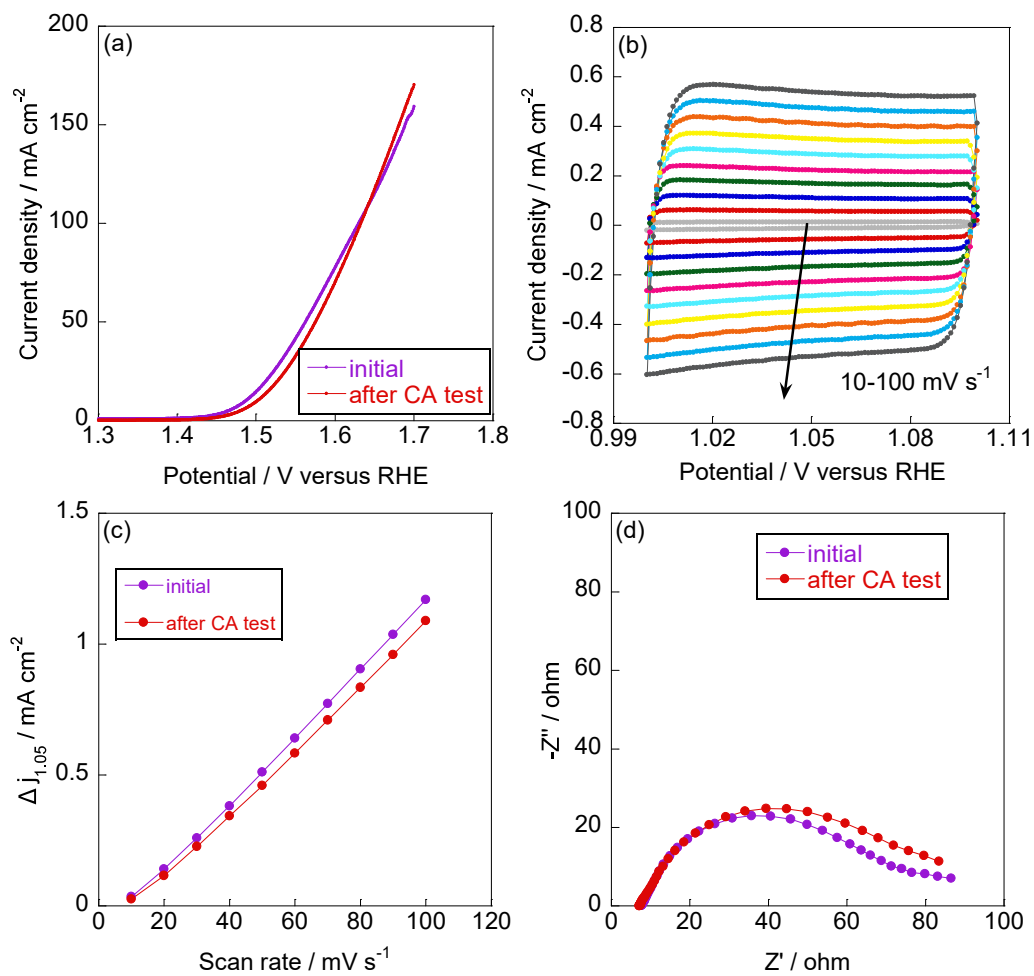

**Figure S16** OER performance (a), cyclic voltammetry curves (b), double-layer capacitances (c) and electrochemical impedance spectroscopies (d) of  $\text{Au}_{0.5}\text{Ir}_{0.5}@CNT$  electrocatalyst after CA test.



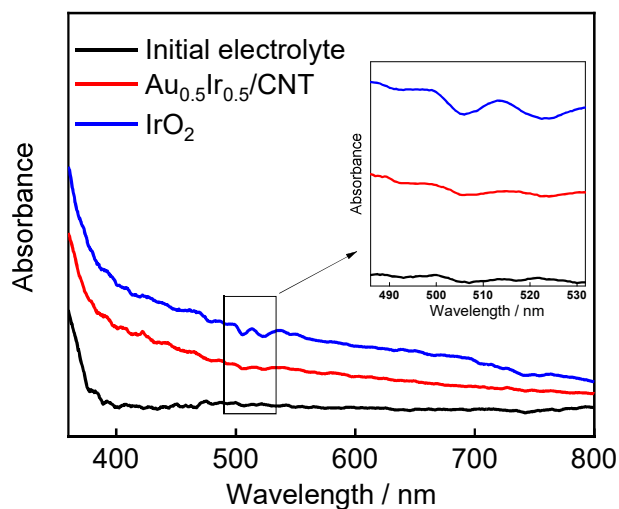

**Figure S17** UV-vis spectroscopies of electrolytes after OER catalysis driven by commercial  $\text{IrO}_2$  and  $\text{Au}_{0.5}\text{Ir}_{0.5}@CNT$ .

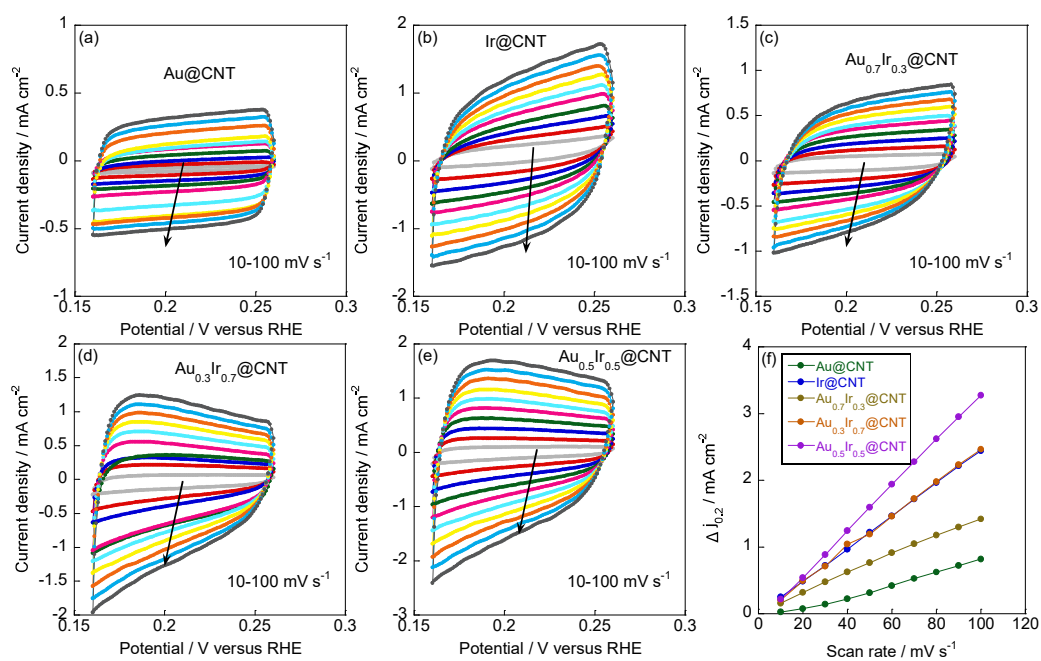

**Figure S18** Cyclic voltammograms recorded for  $\text{Au}@CNT$  (a),  $\text{Ir}@CNT$  (b),  $\text{Au}_{0.7}\text{Ir}_{0.3}@CNT$  (c),  $\text{Au}_{0.3}\text{Ir}_{0.7}@CNT$  (d) and  $\text{Au}_{0.5}\text{Ir}_{0.5}@CNT$  (e) with various scan rates. (f) Calculated double-layer capacitances of various electrocatalysts.

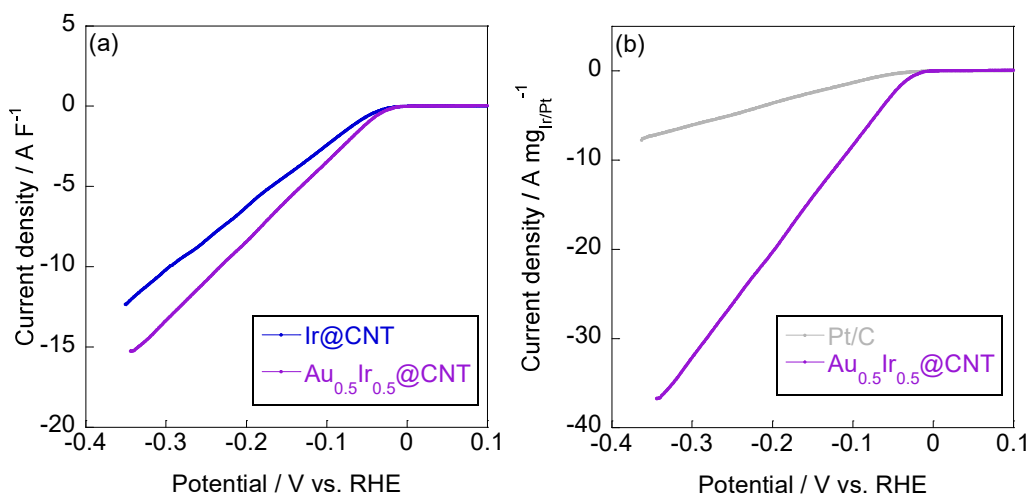

**Figure S19** Specific activity of Ir@CNT and Au<sub>0.5</sub>Ir<sub>0.5</sub>@CNT. Mass activity of Pt/C and Au<sub>0.5</sub>Ir<sub>0.5</sub>@CNT.

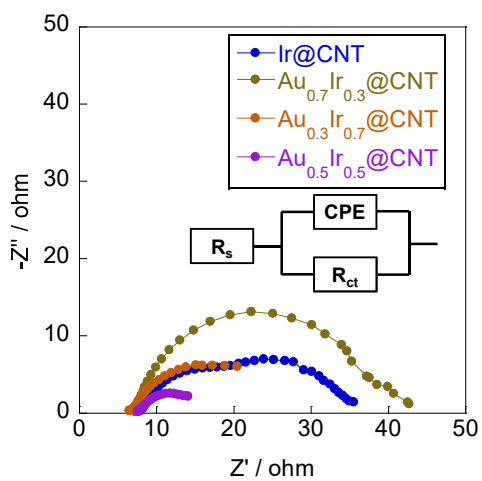

**Figure S20** Electrochemical impedance spectroscopies of Ir@CNT, Au<sub>0.7</sub>Ir<sub>0.3</sub>@CNT, Au<sub>0.3</sub>Ir<sub>0.7</sub>@CNT and Au<sub>0.5</sub>Ir<sub>0.5</sub>@CNT electrocatalysts.

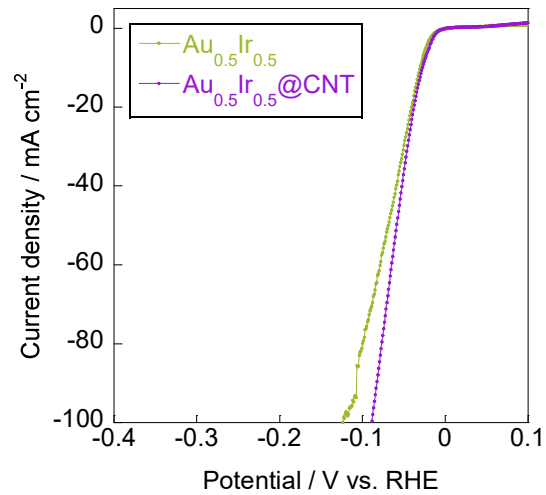

**Figure S21** HER performance of unsupported  $\text{Au}_{0.5}\text{Ir}_{0.5}$  and  $\text{Au}_{0.5}\text{Ir}_{0.5}@\text{CNT}$  electrocatalyst.

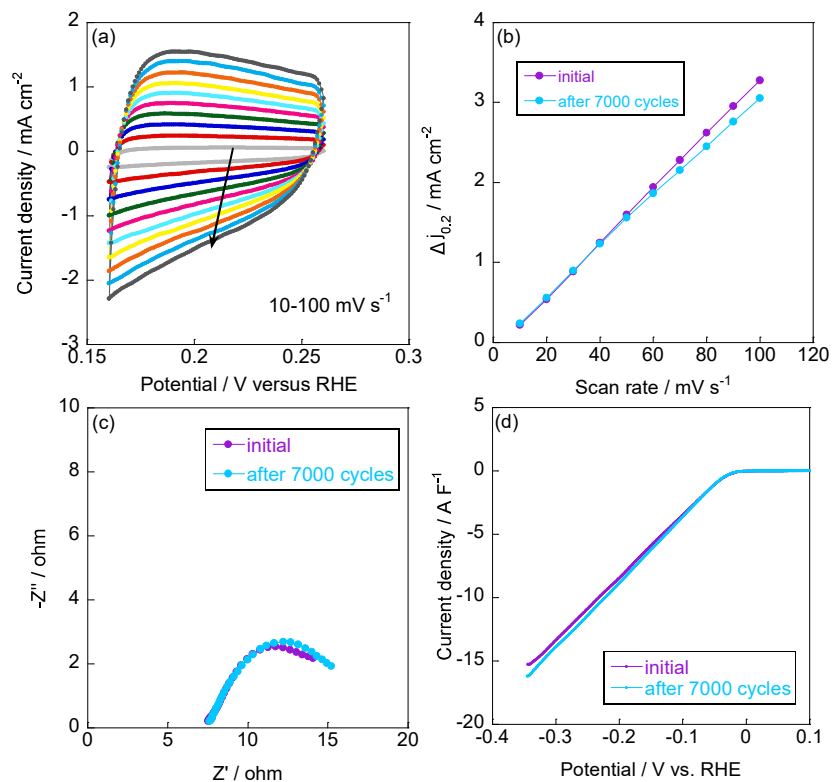

**Figure S22** Cyclic voltammetry curves (a), double-layer capacitances (b), electrochemical impedance spectroscopies (c) and specific activities (d) of  $\text{Au}_{0.5}\text{Ir}_{0.5}@\text{CNT}$  electrocatalyst after 7000 potential cycles.

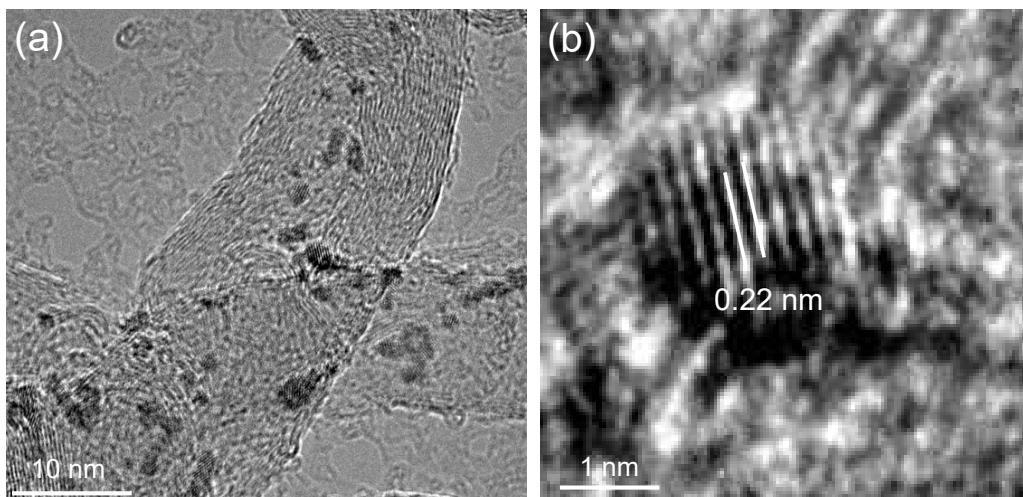

**Figure S23** TEM (a) and HR-TEM (b) images of  $\text{Au}_{0.5}\text{Ir}_{0.5}\text{@CNT}$  electrocatalyst after 7000 potential cycles.

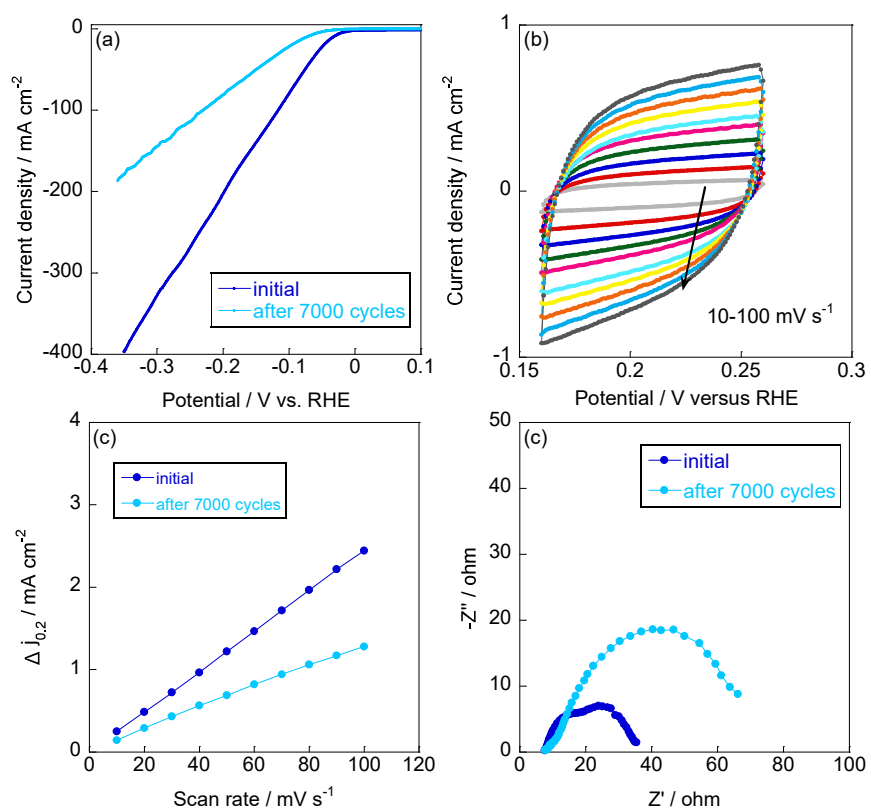

**Figure S24** HER performance (a), cyclic voltammetry curves (b), double-layer capacitances (c) and electrochemical impedance spectroscopies (d) of Ir@CNT electrocatalyst after 7000 potential cycles.

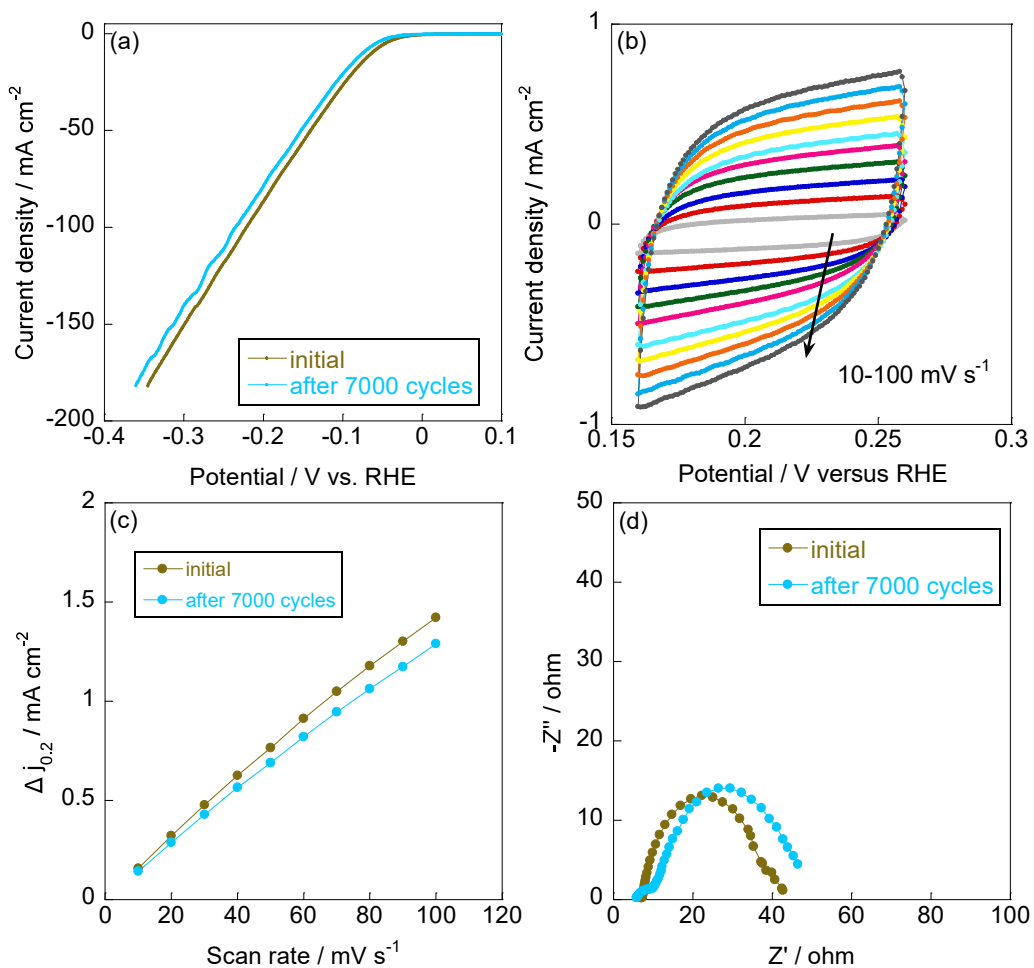

**Figure S25** HER performance (a), cyclic voltammetry curves (b), double-layer capacitances (c) and electrochemical impedance spectroscopies (d) of  $\text{Au}_{0.7}\text{Ir}_{0.3}@CNT$  electrocatalyst after 7000 potential cycles.

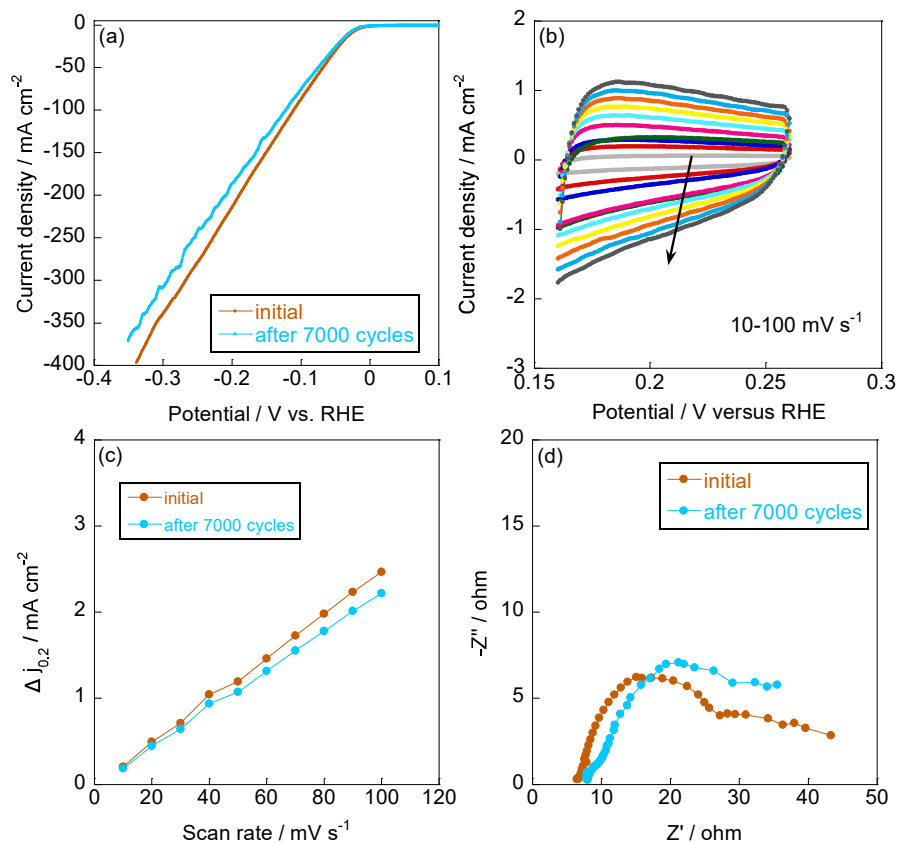

**Figure S26** HER performance (a), cyclic voltammetry curves (b), double-layer capacitances (c) and electrochemical impedance spectroscopies (d) of  $\text{Au}_{0.3}\text{Ir}_{0.7}\text{@CNT}$  electrocatalyst after 7000 potential cycles.

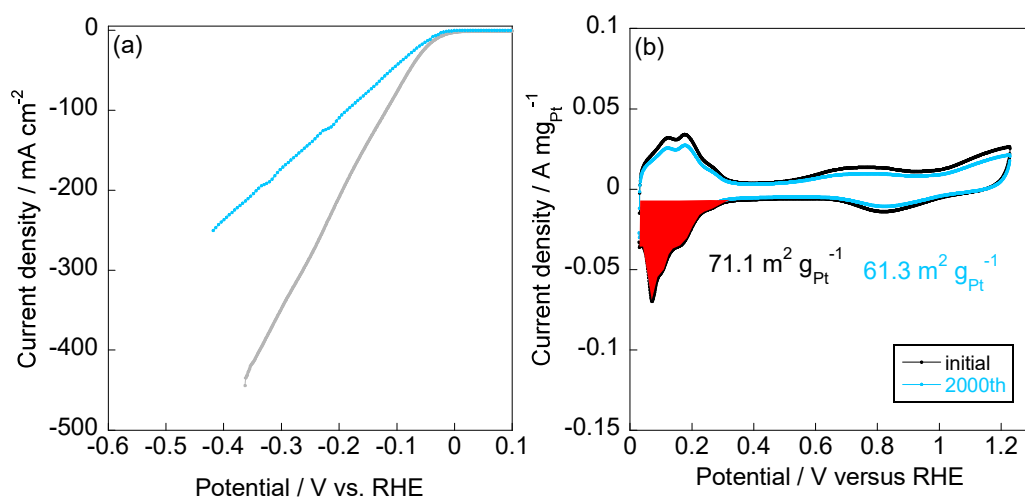

**Figure S27** HER performance (a) and ECSA (b) of commercial Pt/C before and after 2000 potential cycles.

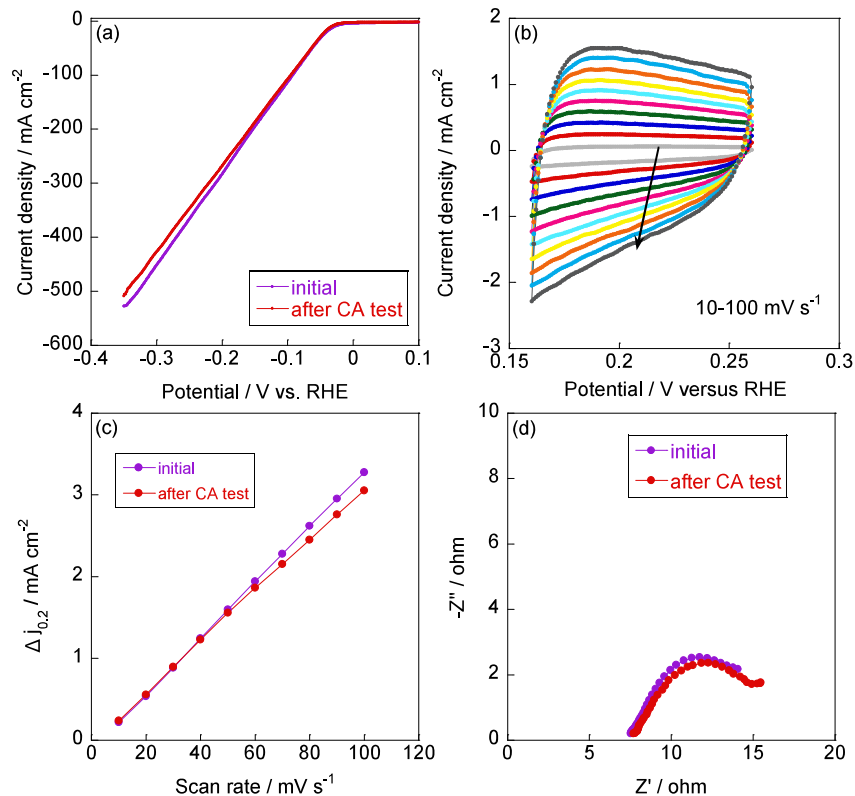

**Figure S28** HER performance (a), cyclic voltammetry curves (b), double-layer capacitances (c) and electrochemical impedance spectroscopies (d) of  $\text{Au}_{0.5}\text{Ir}_{0.5}@CNT$  electrocatalyst after CA test.

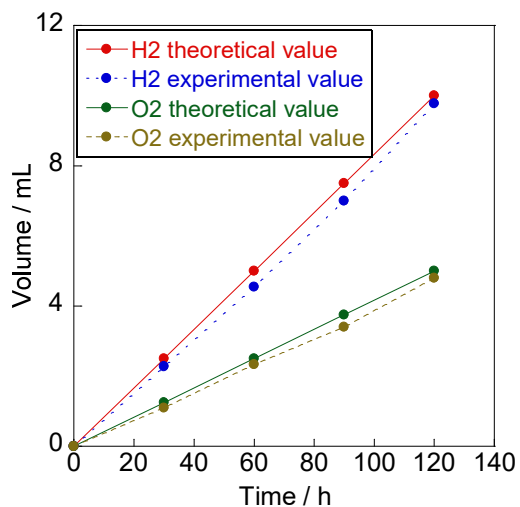

**Figure S29** theoretical and experimental values of  $\text{H}_2$  and  $\text{O}_2$  collected from water splitting driven by  $\text{Au}_{0.5}\text{Ir}_{0.5}@CNT$  electrocatalyst.

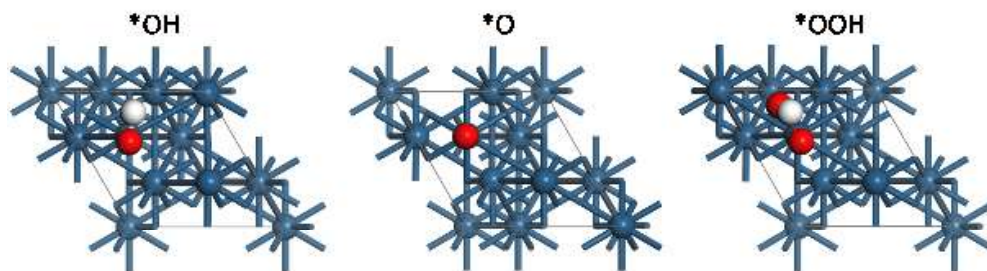

**Figure S30** Structures of the intermediates in OER on Ir(111) surface.

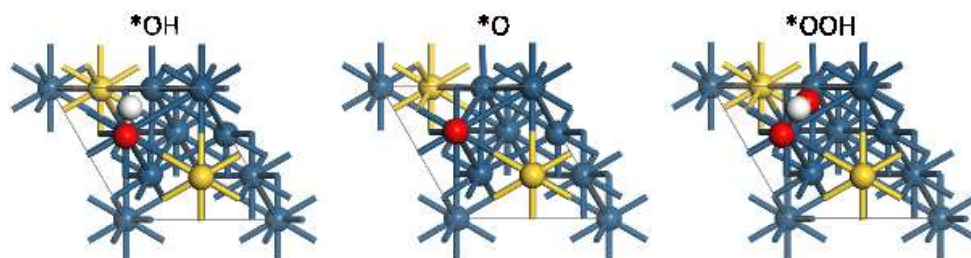

**Figure S31** Structures of the intermediates in OER on AuIr(111) surface.

## References

1. X. Liang, L. Shi, Y. Liu, H. Chen, R. Si, W. Yan, Q. Zhang, G.-D. Li, L. Yang and X. Zou, *Angew. Chem. Int. Ed.*, 2019, **58**, 7631-7635.
2. J. Gao, C.-Q. Xu, S.-F. Hung, W. Liu, W. Cai, Z. Zeng, C. Jia, H. M. Chen, H. Xiao, J. Li, Y. Huang and B. Liu, *J. Am. Chem. Soc.*, 2019, **141**, 3014-3023.
3. J. Shan, C. Guo, Y. Zhu, S. Chen, L. Song, M. Jaroniec, Y. Zheng and S.-Z. Qiao, *Chem*, 2019, **5**, 445-459.
4. H.-S. Oh, H. N. Nong, T. Reier, A. Bergmann, M. Glieth, J. Ferreira de Araújo, E. Willinger, R. Schlögl, D. Teschner and P. Strasser, *J. Am. Chem. Soc.*, 2016, **138**, 12552-12563.
5. Y. Pi, J. Guo, Q. Shao and X. Huang, *Chem. Mater.*, 2018, **30**, 8571-8578.
6. J. Zhu, Z. Chen, M. Xie, Z. Lyu, M. Chi, M. Mavrikakis, W. Jin and Y. Xia, *Angew. Chem. Int. Ed.*, 2019, **58**, 7244-7248.
7. F. Lv, J. Feng, K. Wang, Z. Dou, W. Zhang, J. Zhou, C. Yang, M. Luo, Y. Yang, Y. Li, P. Gao and S. Guo, *ACS Cent. Sci.*, 2018, **4**, 1244-1252.
8. H. Jin, Y. Hong, J. Yoon, A. Oh, N. K. Chaudhari, H. Baik, S. H. Joo and K. Lee, *Nano Energy*, 2017, **42**, 17-25.
9. B. Jiang, Y. Guo, J. Kim, A. E. Whitten, K. Wood, K. Kani, A. E. Rowan, J. Henzie and Y. Yamauchi, *J. Am. Chem. Soc.*, 2018, **140**, 12434-12441.
10. S.-H. Cho, K. R. Yoon, K. Shin, J.-W. Jung, C. Kim, J. Y. Cheong, D.-Y. Youn, S. W. Song, G. Henkelman and I.-D. Kim, *Chem. Mater.*, 2018, **30**, 5941-5950.
11. J. Shan, T. Ling, K. Davey, Y. Zheng and S.-Z. Qiao, *Adv. Mater.*, 2019, **31**, 1900510.
12. L. Fu, F. Yang, G. Cheng and W. Luo, *Nanoscale*, 2018, **10**, 1892-1897.
